# Supplementary material for: Novel and simple route to fabricate fully biocompatible plasmonic mushroom arrays adhered on silk biopolymer
Source: Royal Society of Chemistry journal article supplement (doi:10.1039/c4nr05172f), 2014-11-03
Supplement: c4nr05172f1.pdf [file c4nr05172f1.pdf]

Supplementary Information

**Novel and simple route to fabricate fully biocompatible plasmonic mushroom arrays adhered on silk biopolymer**

Joonhan Park,<sup>†a</sup> Yunkyoung Choi,<sup>†b</sup> Myungjae Lee,<sup>†b</sup> Heonsu Jeon<sup>bc</sup> and Sunghwan Kim<sup>\*ad</sup>

<sup>a</sup> Department of Energy Systems Research, Ajou University, Suwon 443-749, Republic of Korea

<sup>b</sup> Department of Physics and Astronomy, Seoul National University, Seoul 151-749, Republic of Korea

<sup>c</sup> Department of Biophysics and Chemical Biology, Seoul National University, Seoul 151-749, Republic of Korea

<sup>d</sup> Department of Physics, Ajou University, Suwon 443-749, Republic of Korea. E-mail: [sunghwankim@ajou.ac.kr](mailto:sunghwankim@ajou.ac.kr)

<sup>†</sup>These authors contributed equally to this work.

<sup>\*</sup>Corresponding author: Sunghwan Kim (e-mail: [sunghwankim@ajou.ac.kr](mailto:sunghwankim@ajou.ac.kr))

## 1. Angle-dependence of the Silk-Au MA

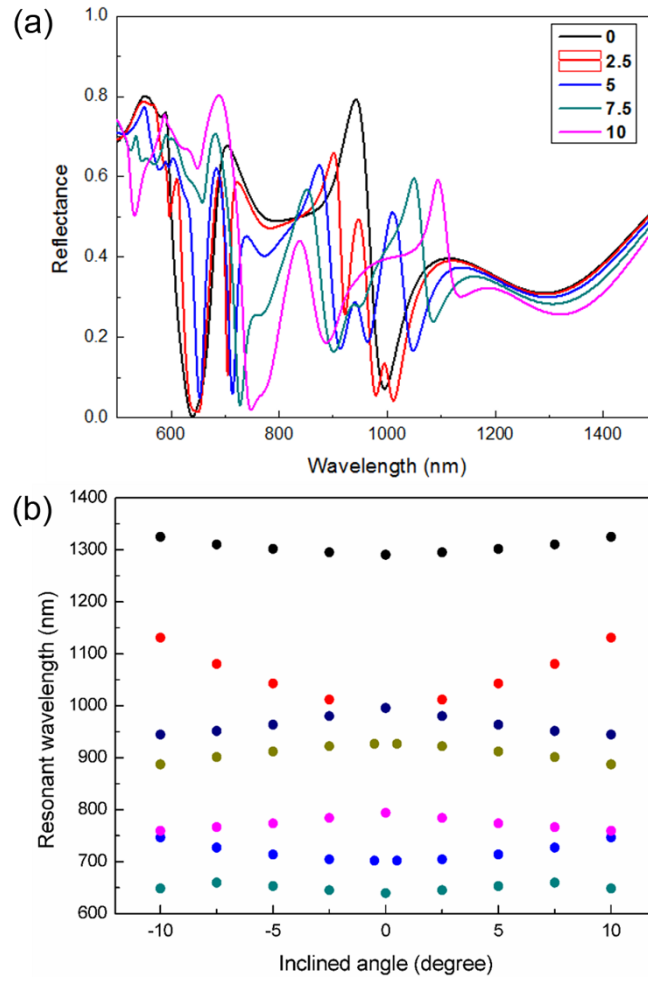

Fig. S1 (a) Effect of the angle of incidence on the reflection for the Silk-Au MA structure in simulation. (b) Plot of wavelength of resonance modes as a function of incident angle.

To investigate the angle-dependence of plasmonic resonances shown in the Silk-Au MA, numerical simulations were performed by employing a commercial FDTD software (FDTD solutions, Lumerical Solutions) to generate the reflectance spectra. The Bloch boundary condition including a single Au mushroom in the  $x$  and  $y$  directions (lateral) was used; this includes perfect matching layers (PMLs) on the top and bottom boundaries of the simulation unit-cell. The complex dielectric constants of Au were taken from the Palik handbooks. The refractive index of silk used herein was 1.5. For structure excitation, a plane wave source, normally launched to the top Au cap, was used. The plane wave covers a wavelength range of 500–1500 nm with 5000 frequency points. Reflected light was recorded on the top PML.

As shown in Fig. S1, since surface plasmons in a periodic metal structure are coupled to the Bragg resonance, the Silk-Au MA exhibits the angular dispersion of plasmonic modes. We also confirmed that there was a degenerated Bragg resonance around  $\lambda \sim 1000$  nm due to the symmetry of the periodic

lattice for the normal incidence. This resonance could be split when the symmetry was broken by the oblique incident.

## 2. Atomic force microscopy image of the Au nanoparticle array on a silk film

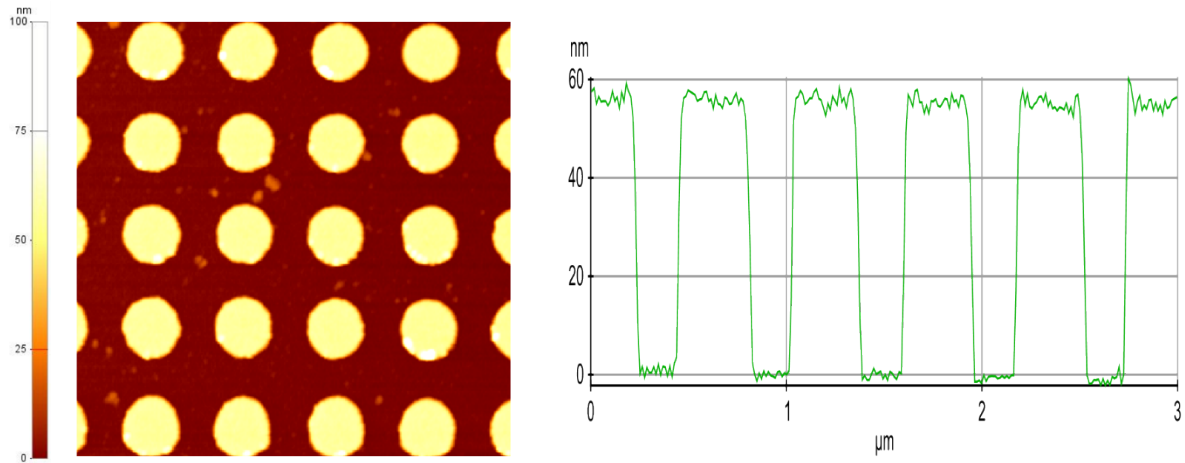

Fig. S2 Atomic force microscopy image of the nanoparticle array on the silk film after 1 hour ultra-sonication.
